# Supplementary material
Source: JCI journal article supplement (doi:10.1172/jci158908)

|             | WT<br>(n=12)           | <i>Phd2</i> <sup>-/-</sup> cKO<br>(n=14) | <i>Phd2</i> <sup>-/-</sup> cKO + ACF<br>(n=5; GD7.5-14.5) |
|-------------|------------------------|------------------------------------------|-----------------------------------------------------------|
| Sex         | M: 50.7 %<br>F: 49.3 % | M: 48.5 %<br>F: 51.5 %                   | M: 48.7 %<br>F: 51.3 %                                    |
| Litter size | 9.5 ± 0.3              | 7.7 ± 0.5*                               | 8.8 ± 0.2                                                 |

**Table S1:** Fetal sex and litter size of WT, *Phd2*<sup>-/-</sup> and *Phd2*<sup>-/-</sup> pregnant mice treated with ACF. ACF treatment: 2mg/kg; \*p< 0.05 relative to the WT pregnant mice, one-way ANOVA, Neuman-Keuls posthoc-test. M: Male; F: female.

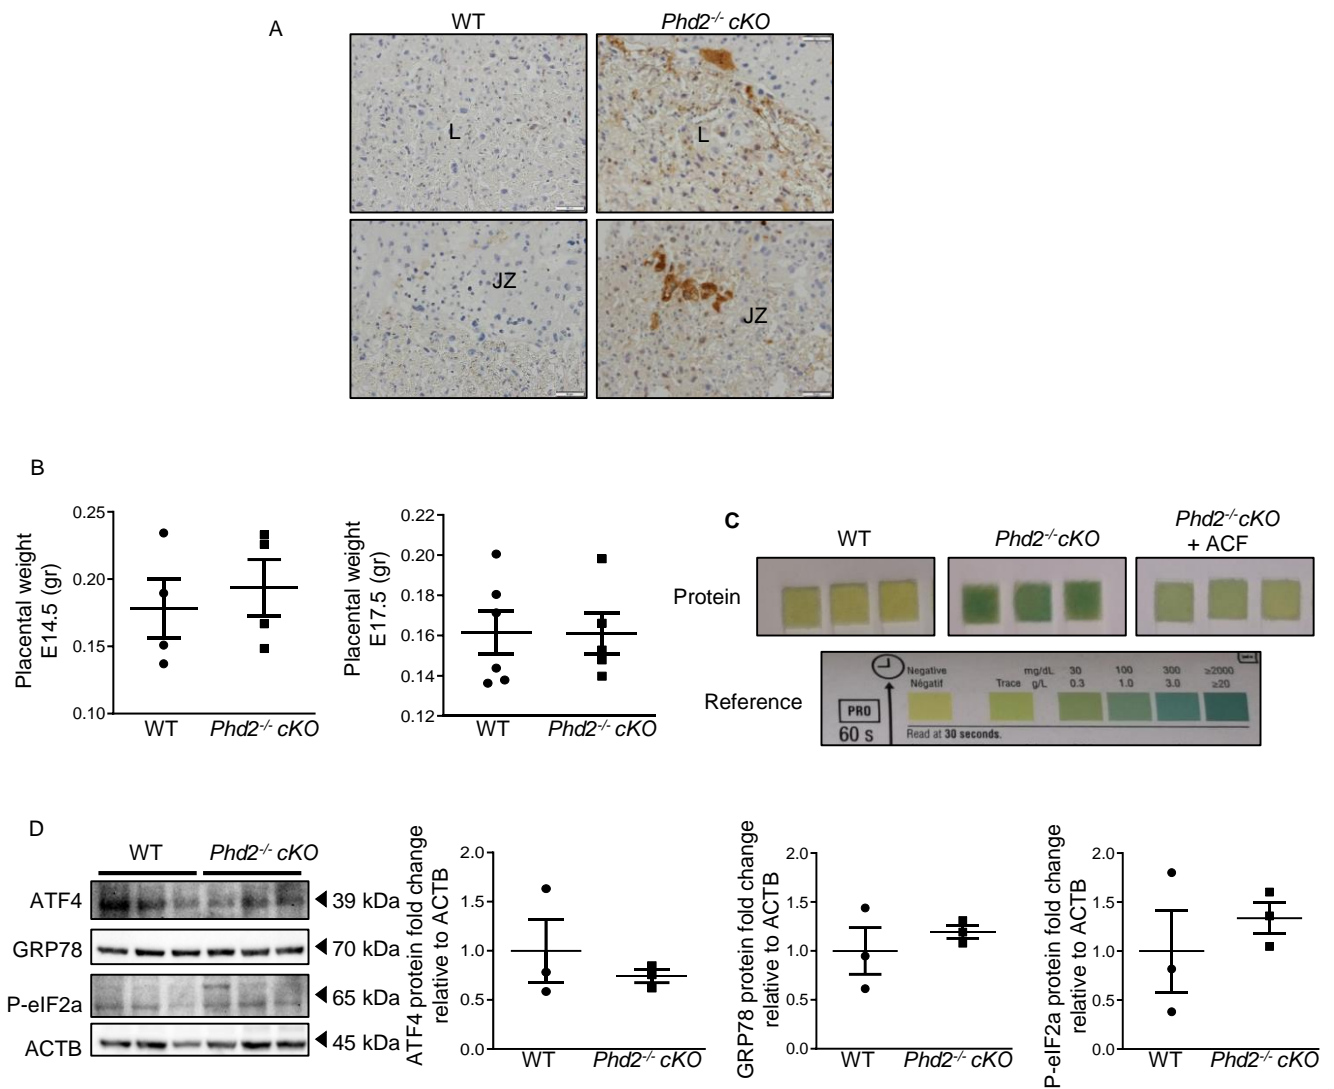

**Fig. S1. (A)** Representative immunohistochemical staining for Hypoxyprobe™ indicating areas of hypoxia (positive brown staining for piminidazole adducts) within the placental labyrinth and junctional zone layers in *Phd2<sup>-/-</sup> cKO* mice (Scale bars represent 50µm). **(B)** WT and *Phd2<sup>-/-</sup>* placental weights at gestational day14.5 (n=4 WT litters, 38 placentae and n=4 *Phd2<sup>-/-</sup> cKO* litters, 37 placentae) and 17.5 (n=7 WT litters, 71 placentae and n=5 *Phd2<sup>-/-</sup> cKO* litters, 52 placentae). **(C)** Representative Uristix® measurements of protein in urine collected at day 17.5 of pregnancy from WT and *Phd2<sup>-/-</sup> cKO* pregnant mice and *Phd2<sup>-/-</sup> cKO* pregnant mice treated with ACF during early (GD7.5-14.5) pregnancy (urine of 3 separate pregnant mice per condition). **(D)** Representative immunoblots for ATF4, GRP78, P-eIF2a and associated densitometry in whole placental lysates from WT and *Phd2<sup>-/-</sup> cKO* placentae (n=3 WT and n=3 *Phd2<sup>-/-</sup> cKO* placentae).

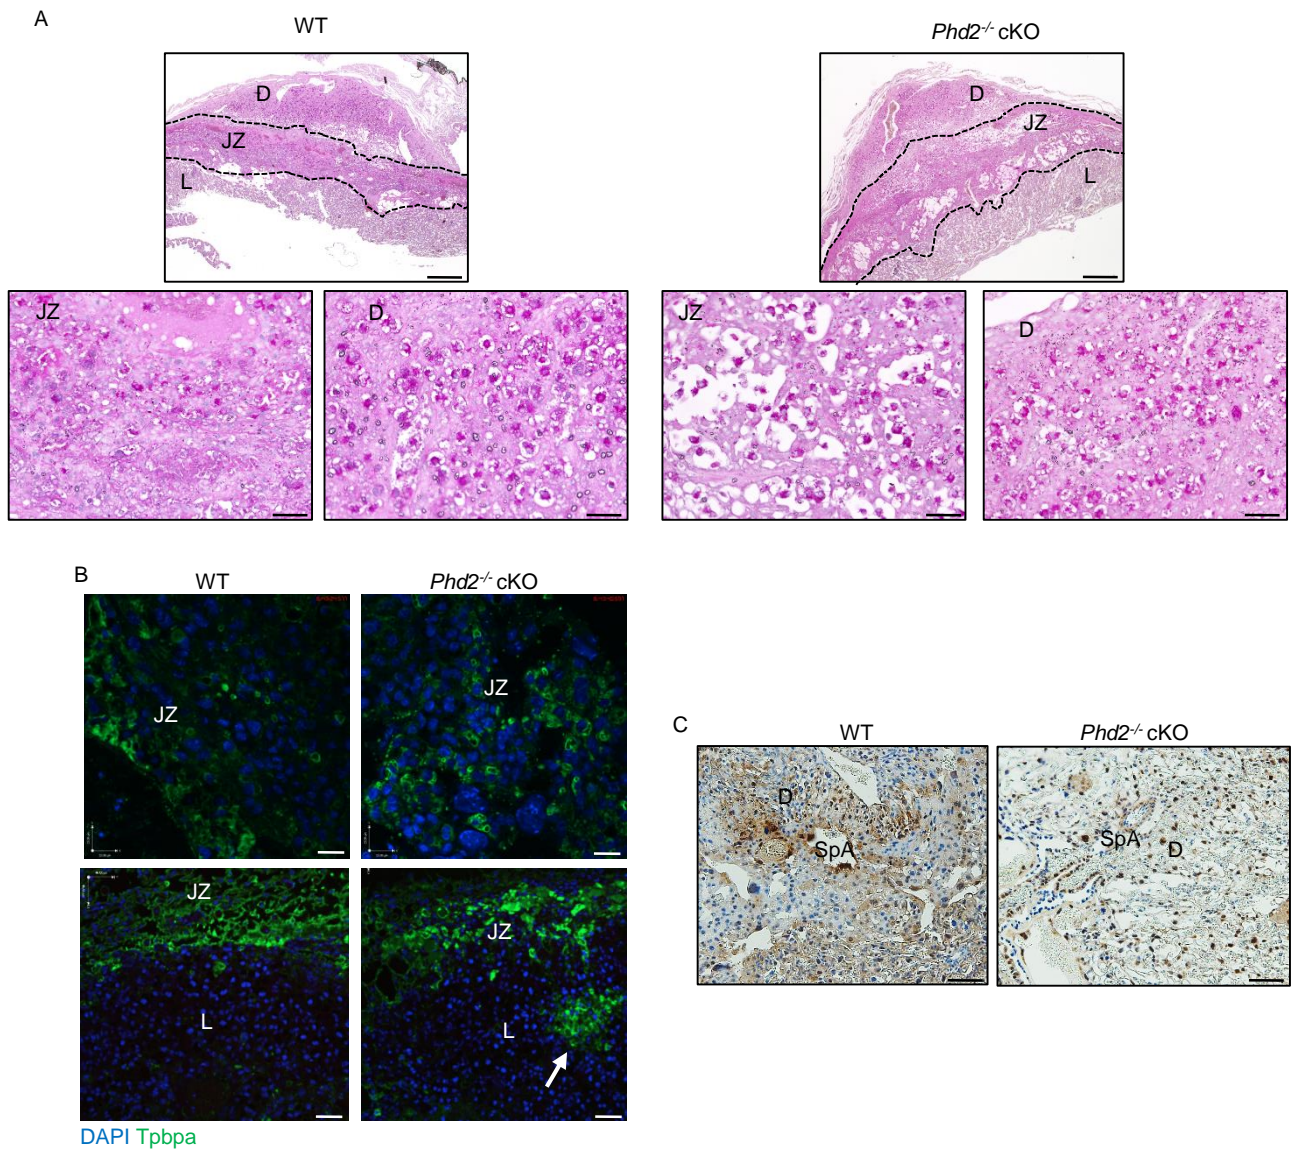

**Fig. S2. (A)** Representative PAS staining of WT and *Phd2*<sup>-/-</sup> cKO placentae at gestational day 14.5 (Scale bars represent 500µm). Higher magnifications (Scale bars represent 50µm) to visualize PAS-positive glycogen cells in JZ and decidua. D: decidua; JZ: junctional zone; L: labyrinth. **(B)** Representative immunofluorescence staining for *Tpbpa*-positive spongiotrophoblast (SpT) in JZ (top panels) and labyrinth (bottom panels) of GD14.5 WT and *Phd2*<sup>-/-</sup> cKO placentae; nuclei were visualized with DAPI (scale bars represent 25 µm). JZ: Junctional Zone. L: labyrinth. Arrow: SpT islets in labyrinth. spongiotrophoblast (SpT) in JZ (top panels) and labyrinth (bottom panels) of GD14.5 WT and *Phd2*<sup>-/-</sup> cKO placentae. **(C)** Representative immunohistochemistry for CD69 positive uNK cells in sections from WT and *Phd2*<sup>-/-</sup> cKO decidua (Scale bars represent 50µm).

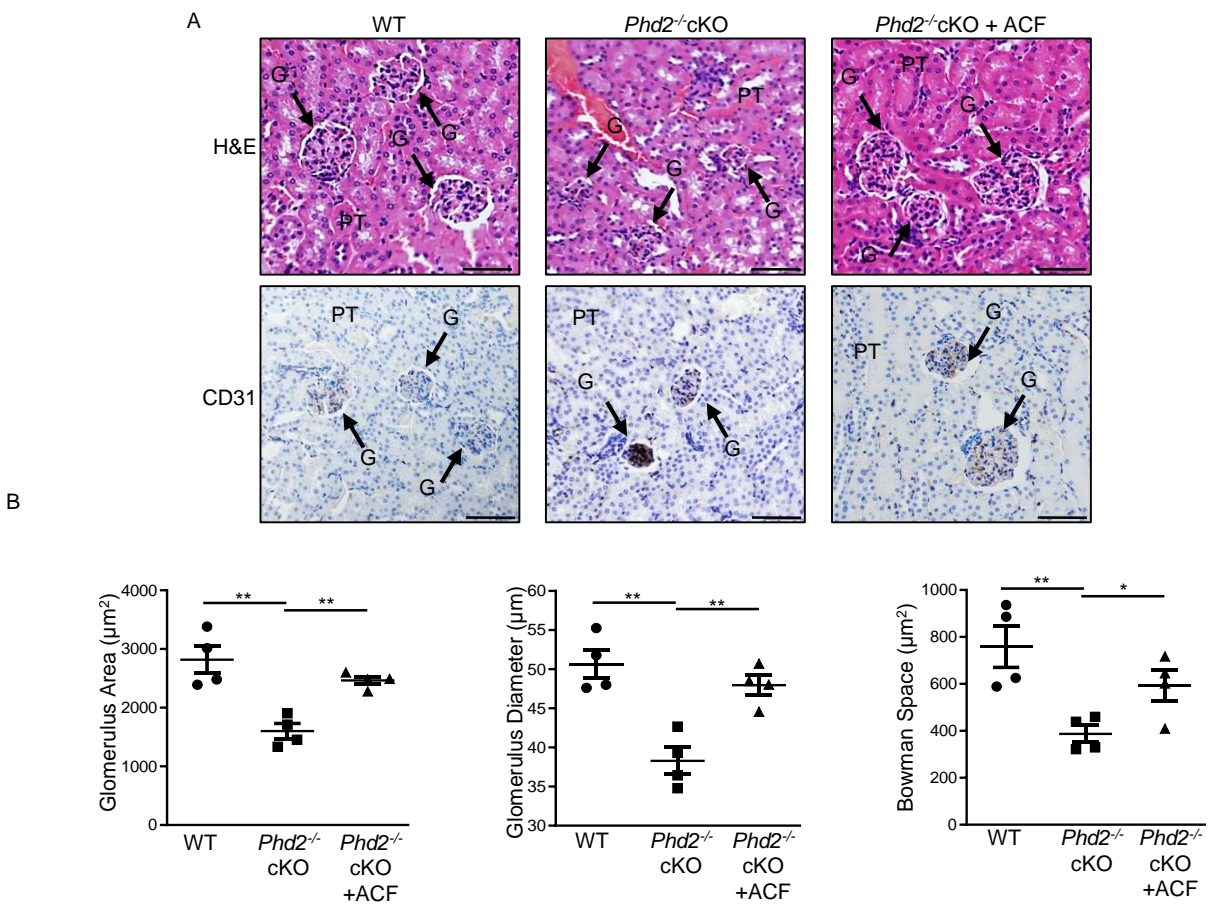

**Fig. S3. (A)** Representative H&E-stained (top panel) and CD31-immunostained (bottom panel) maternal kidneys at day 17.5 of pregnancy of WT and *Phd2*<sup>-/-</sup> cKO pregnant mice treated with either PBS or ACF. G: glomeruli; PT: proximal tubules. (scale bars represent 50µm). **(B)** Morphometry analyses of glomerulus area and diameter, and Bowman space area in E17.5 kidneys from WT and *Phd2*<sup>-/-</sup> cKO pregnant mice treated with either PBS or ACF (\*\**p*<0.01 relative to the WT measurements, one-way ANOVA, Neuman-Keuls posthoc-test, *n*=32 glomeruli of 4 kidneys from WT pregnant dams, *n*=53 glomeruli of 4 kidneys from PBS treated *Phd2*<sup>-/-</sup> cKO pregnant dams, *n* = 48 glomeruli of 4 kidneys from ACF treated *Phd2*<sup>-/-</sup> cKO pregnant dams).

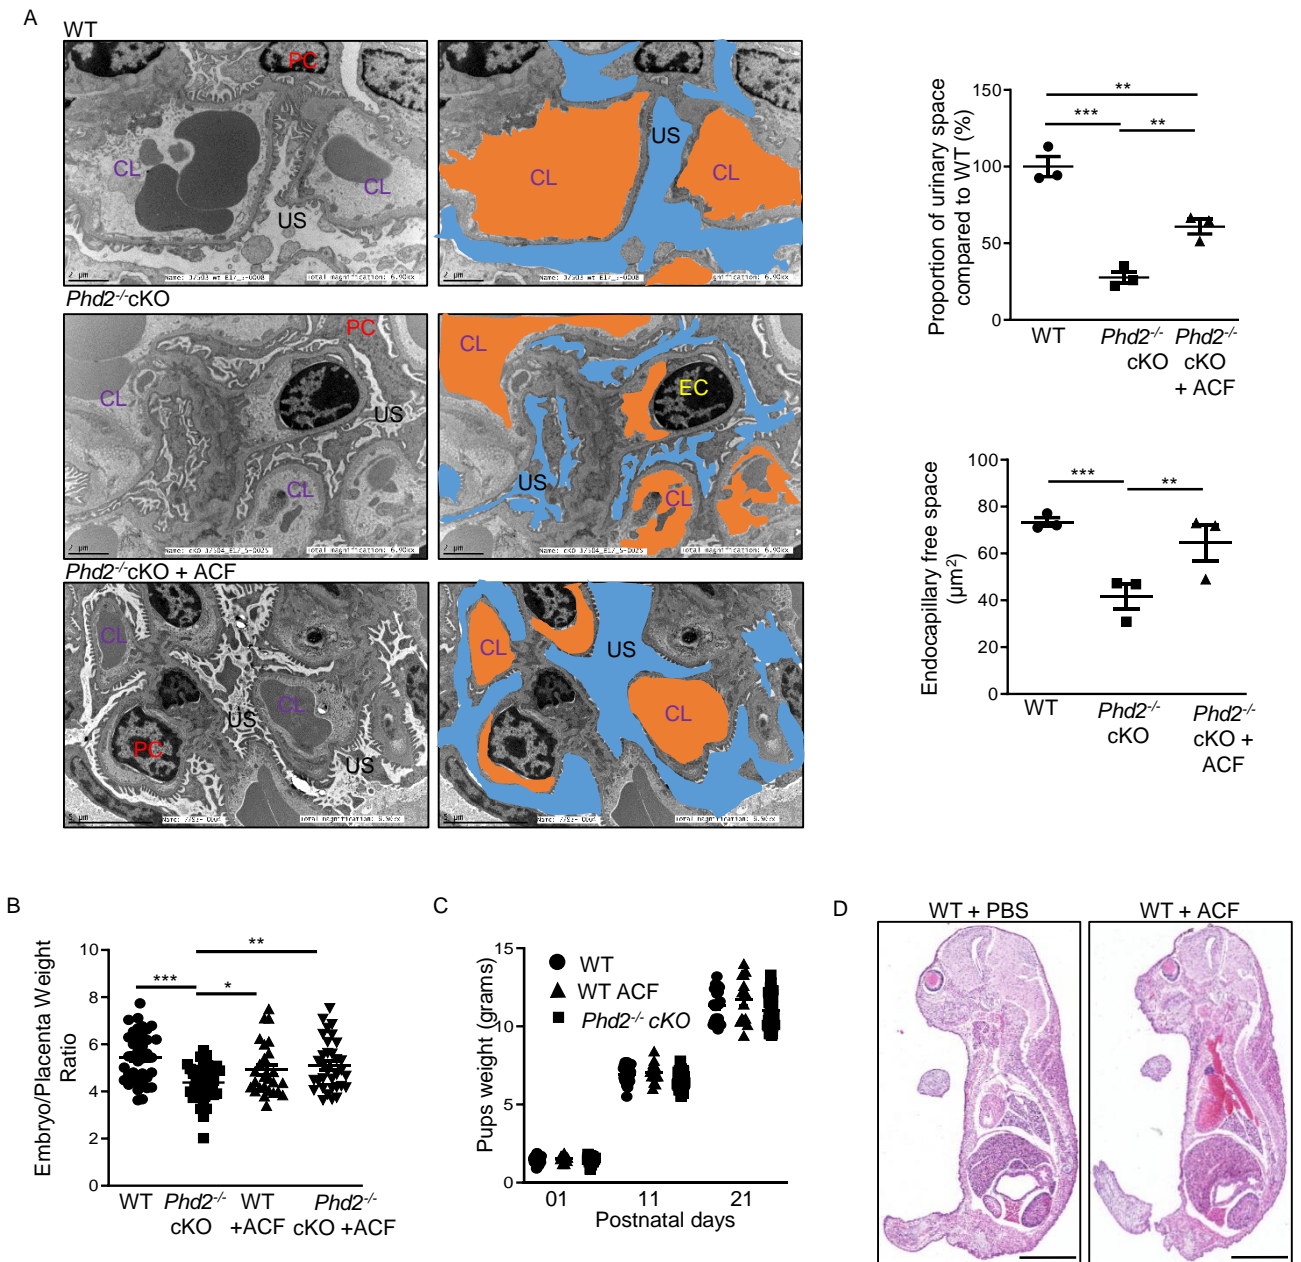

**Fig. S4. (A-left panels)** Representative TEM images of glomeruli from maternal kidneys at day 17.5 of pregnancy of WT and *Phd2*<sup>-/-</sup>cKO pregnant mice treated with either PBS or ACF. US: urinary spaces; CL: capillary loop; PC: podocytes; EC: endothelial cells. **(A-right panels)** Morphometric analyses of the urinary space and open endocapillary space in maternal kidney glomeruli at gestational day 17.5 of pregnancy of WT and *Phd2*<sup>-/-</sup> pregnant mice treated with either PBS or ACF. Urinary space is expressed as a percentage of total glomeruli area (\**p*<0.05 relative to WT, one-way ANOVA, Neuman-Keuls posthoc-test, *n*=18 glomeruli of 3 separate WT pregnant mice, *n*=23 glomeruli of 3 separate *Phd2*<sup>-/-</sup>cKO pregnant mice, *n*=16 glomeruli of 3 separate *Phd2*<sup>-/-</sup>cKO pregnant mice treated with ACF). **(B)** Fetal over placental weight ratios at E17.5 of ACF- and PBS-treated (GD7.5-14.5) mothers (\**p*< 0.05, \*\**p*< 0.01, \*\*\**p*< 0.001, one-way ANOVA, Neuman-Keuls posthoc-test, *n*=38 WT embryos, *n*=46 *Phd2*<sup>-/-</sup>cKO embryos, *n*=26 embryos of ACF-treated WT pregnant dams, *n*=32 embryos of ACF-treated *Phd2*<sup>-/-</sup>cKO pregnant mothers); **(C)** Postnatal growth of pups (weights at PND1, 11, 21) from WT mothers injected during early pregnancy (from GD7.5 to 14.5) with either PBS or 2 mg/kg ACF. **(D)** Representative mid-sagittal H&E-stained sections of E17.5 embryos from WT mothers treated with either PBS or 2 mg/kg ACF (scale bars represent 25mm).

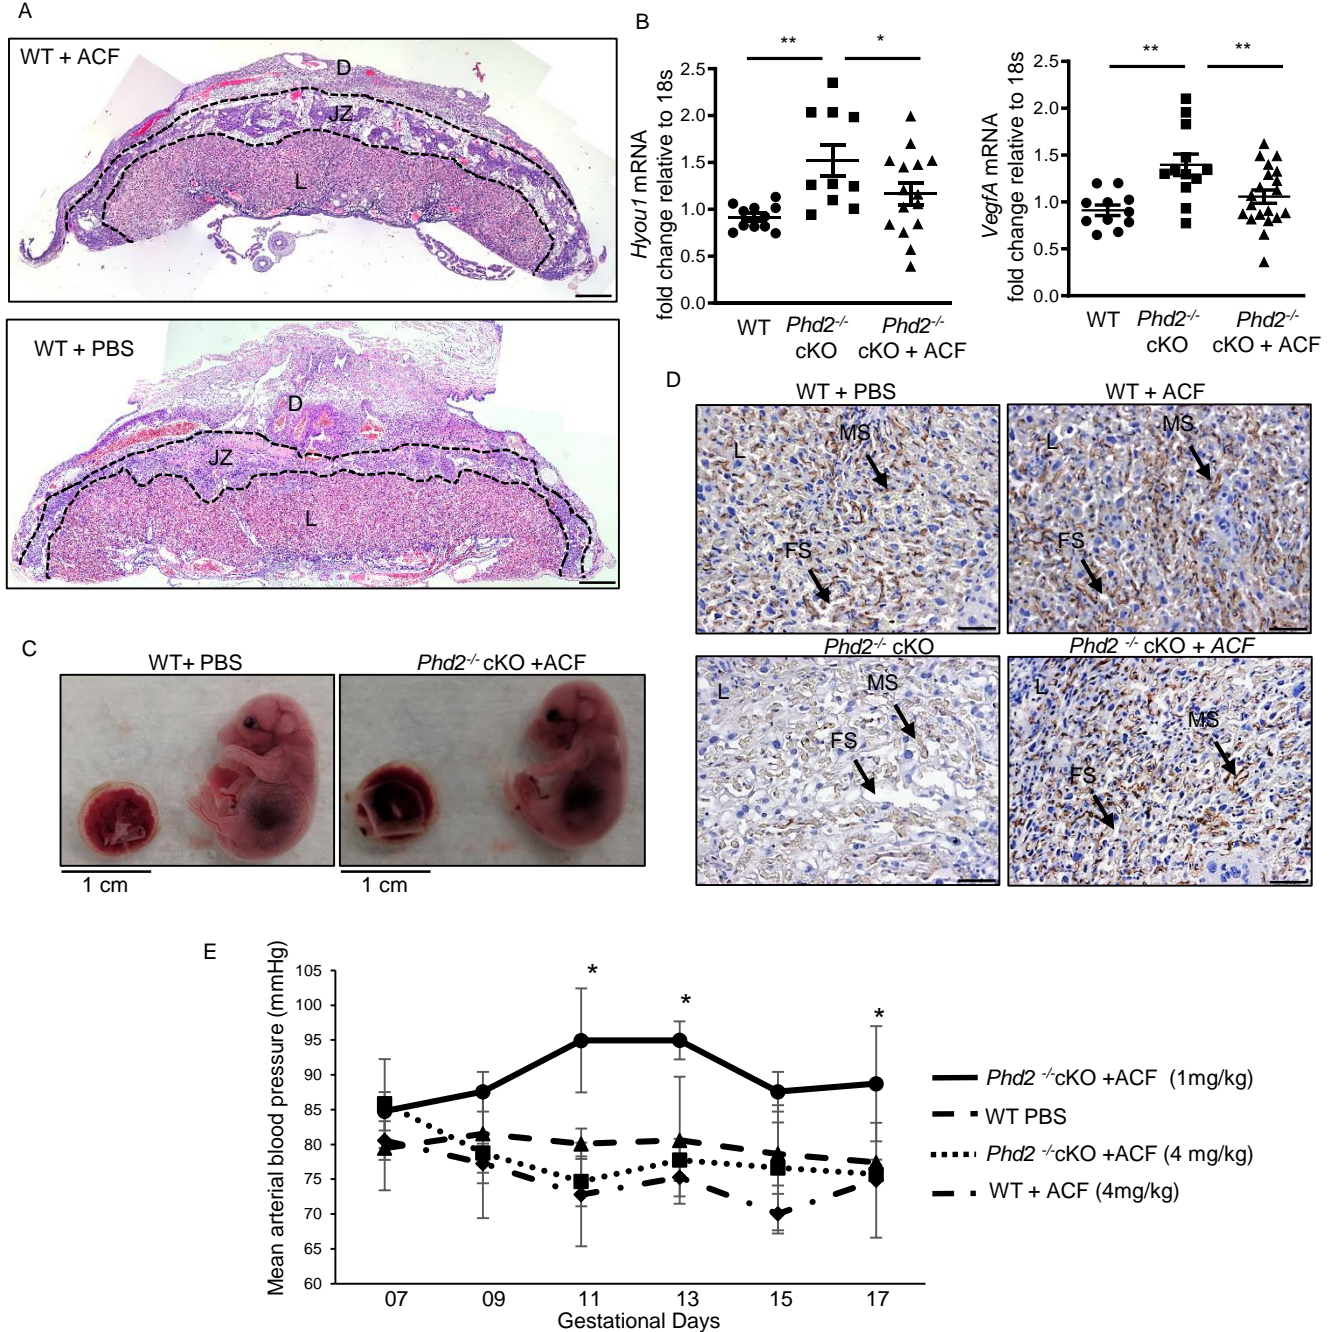

**Fig. S5. (A)** Representative H&E-stained whole placental section from WT mice treated with 2mg/kg of ACF or control vehicle PBS during early (GD7.5-14.5) pregnancy (magnification 10X, scale bars represent 300 $\mu$ m). D: decidua; JZ: junctional zone; L: labyrinth. **(B)** qPCR of *Hyou1* and *Vegfa* in E17.5 placentae from WT and *Phd2*<sup>-/-</sup> cKO pregnant mice treated with either PBS or ACF (\* $p$ <0.05, one-way ANOVA, Neuman-Keuls posthoc-test,  $n$ =13 WT placentae,  $n$ =14 *Phd2*<sup>-/-</sup>cKO placentae,  $n$ =19 *Phd2*<sup>-/-</sup>cKO +ACF placentae) **(C)** Gross morphology of E17.5 placentae and fetuses from WT and *Phd2*<sup>-/-</sup> cKO mice treated with either PBS or ACF during early (GD7.5-14.5) pregnancy. **(D)** Representative IHC staining for CD34 (endothelial cell marker) in E17.5 placentae from WT and *Phd2*<sup>-/-</sup>cKO mice after treatment with PBS or ACF during early (GD7.5-14.5) pregnancy (magnification 20X, scale bars represent 50 $\mu$ m). L: labyrinth; FS: fetal sinusoids; MS: maternal sinusoids. **(E)** Mean arterial blood pressure across gestation in WT pregnant mice injected during early (GD7.5-14.5) pregnancy with either PBS or 4mg/kg ACF and *Phd2*<sup>-/-</sup> cKO pregnant mice treated with either 1mg/kg or 4 mg/kg ACF (\* $p$ < 0.05 relative to the WT pregnant mice, one-way ANOVA, Neuman-Keuls posthoc-test,  $n$ =3 separate pregnant mice per condition).

Full unedited gels for Figure 1 Panel C

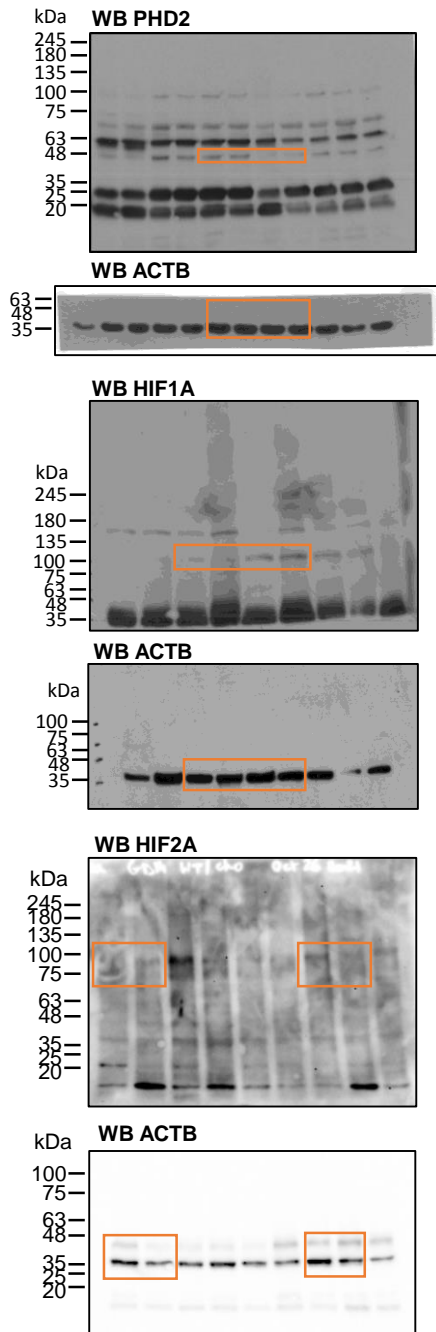

Full unedited gels for Figure S1 Panel A

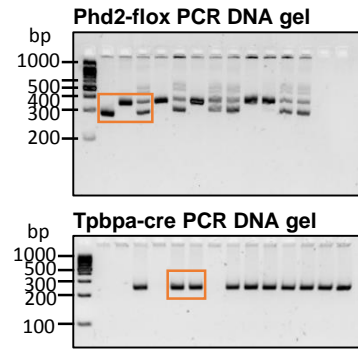

Full unedited gels for Fig S1 Panel D

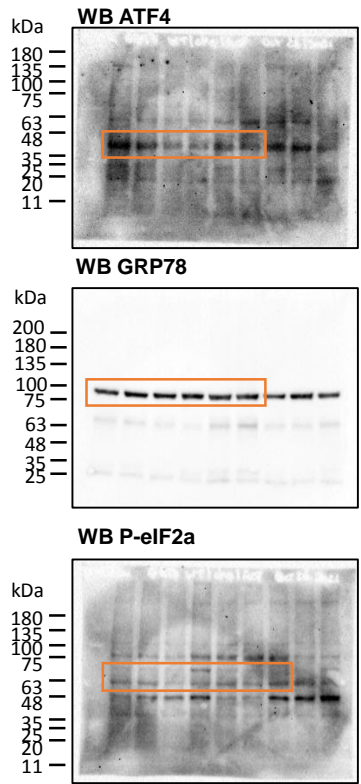

Full unedited gels for Figure 6 Panel C

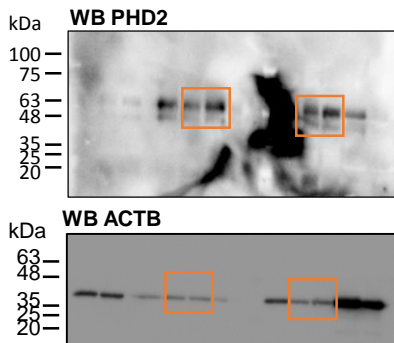

Supplement: sd1 [file 1]
